# Supplementary material for: CdS@Ni3S2 core–shell nanorod arrays on nickel foam: a multifunctional catalyst for efficient electrochemical catalytic, photoelectrochemical and photocatalytic H2 production reaction
Source: Royal Society of Chemistry journal article supplement (doi:10.1039/c8ta08837c), 2018-11-27
Supplement: c8ta08837c1.pdf [file c8ta08837c1.pdf]

## Supplementary Material

**Title: CdS@Ni<sub>3</sub>S<sub>2</sub> core-shell nanorod arrays on nickel foam: a multifunctional catalyst for efficient electrochemical catalytic, photoelectrochemical and photocatalytic H<sub>2</sub> production reaction**

HaojianGuan,<sup>a</sup> ShengsenZhang,<sup>a</sup> Xin Cai,<sup>a</sup> QiongzhiGao,<sup>a</sup> XiaoyuanYu,<sup>a</sup>

XiaosongZhou,<sup>c</sup> Feng Peng,<sup>\*b</sup> Yueping Fang,<sup>\*a</sup> Siyuan Yang<sup>\*a</sup>

<sup>a</sup> College of Materials and Energy, South China Agricultural University, Guangzhou, 510642, Peoples' Republic of China

\*E-mail: siyuan\_yang@scau.edu.cn; ypfang@scau.edu.cn

<sup>b</sup> School of Chemistry and Chemical Engineering, Guangzhou University, Guangzhou, 510006, Peoples' Republic of China

\*E-mail: fpeng@gzhu.edu.cn

<sup>c</sup> School of Chemistry and Chemical Engineering, and Institute of Physical Chemistry, Lingnan Normal University, Zhanjiang, 524048, Peoples' Republic of China

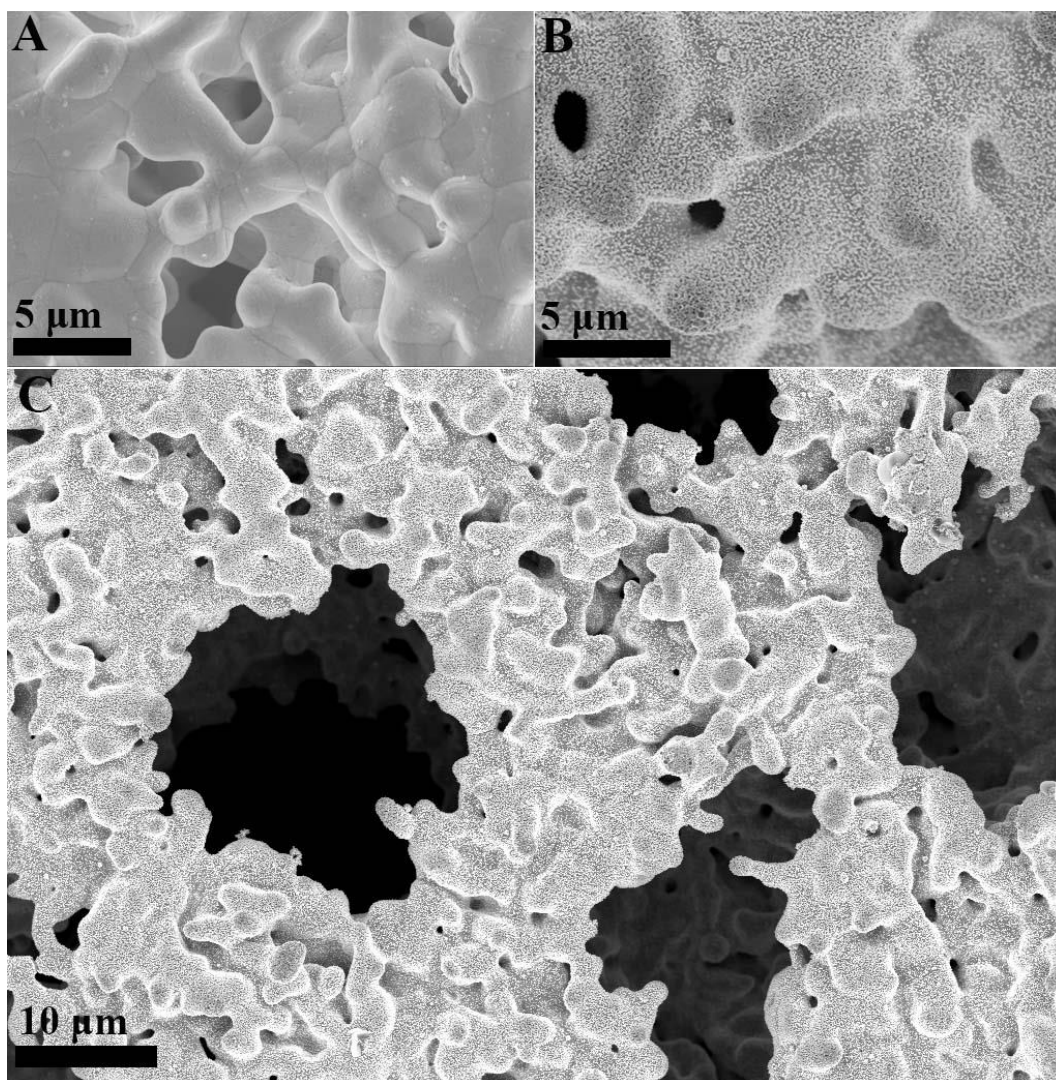

Fig. S1. Low magnification SEM images of: (A) pure Ni foam and (B) CdS@Ni<sub>3</sub>S<sub>2</sub>core@shell nanorods arrays on Ni foam after the hydrothermal synthesized process; (C) A large-scale SEM image of the typical CdS@Ni<sub>3</sub>S<sub>2</sub> nanorod arrays on the Ni foam, which demonstrated the homogeneous of the sample.

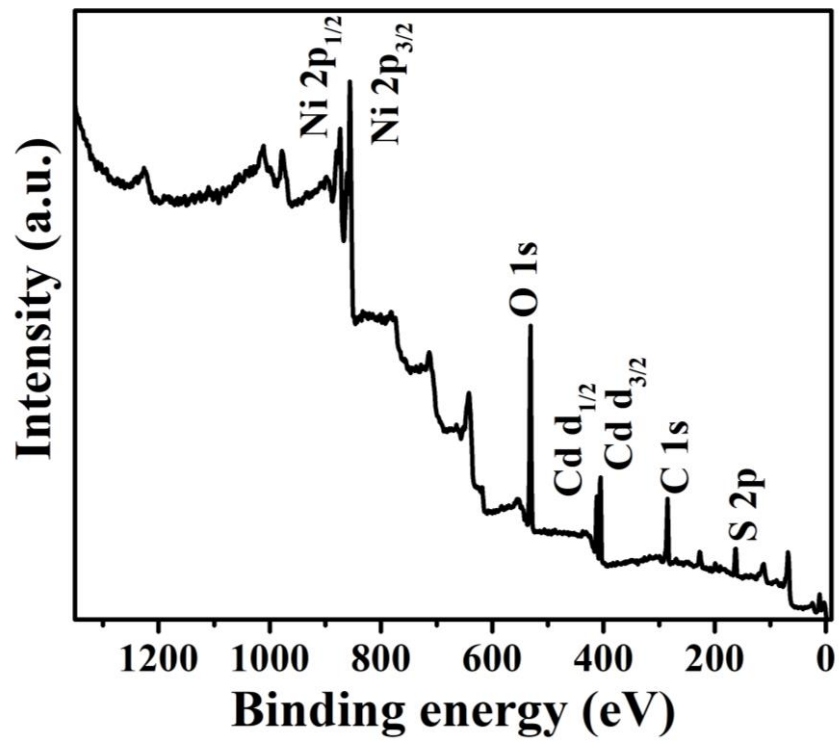

Fig. S2. The XPS survey spectrum of a typical CdS@Ni<sub>3</sub>S<sub>2</sub> samples.

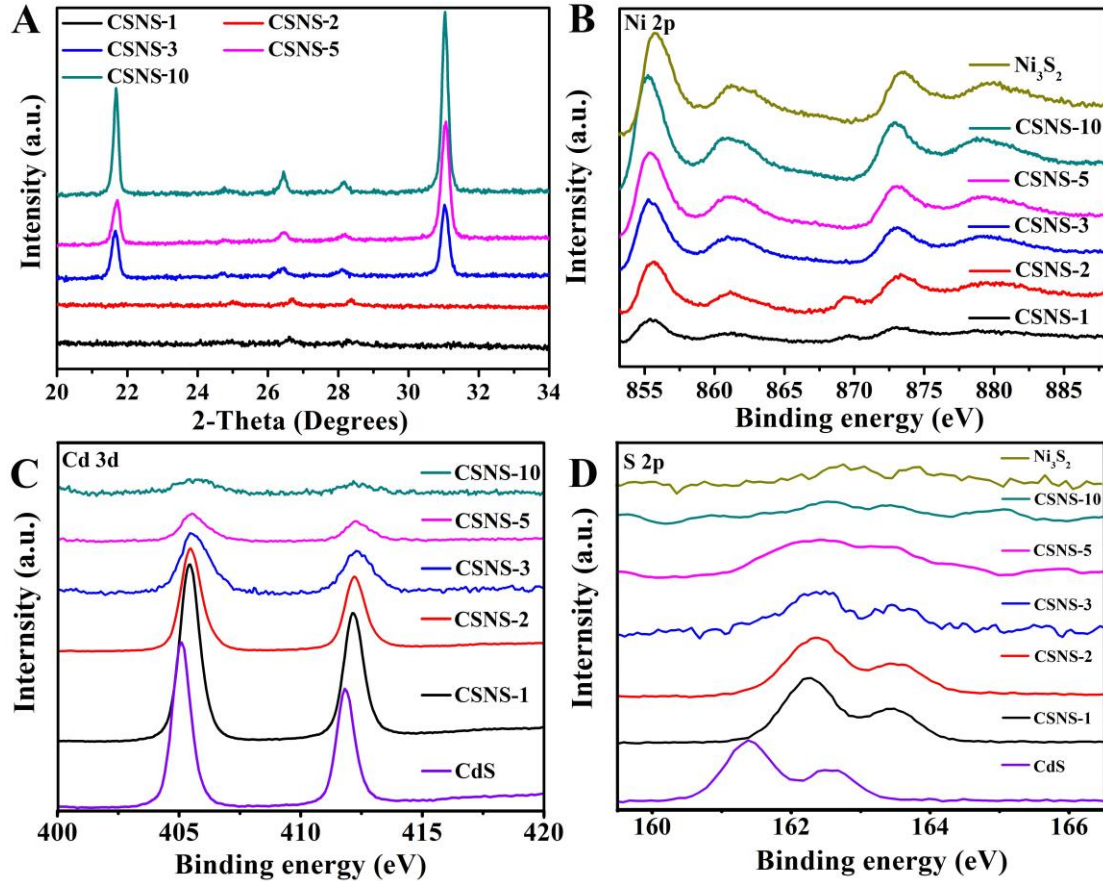

Fig. S3. XRD (A) and high-resolution XPS spectra of the CSNS-x samples, pure CdS and pure Ni<sub>3</sub>S<sub>2</sub> samples with Ni 2p (B), Cd 3d (C) and S 2p (D) spectrum.

As shown in Fig. S3 (A), the diffraction peaks intensity of CSNS x nm samples are obviously increased along with the S<sup>2-</sup>/Cd<sup>2+</sup> precursor ratios increasing from 1:2 to 3:2, however, the enhancement peaks intensity trend of the Ni<sub>3</sub>S<sub>2</sub> species are stronger than that of CdS. Moreover, comparing from Fig. S3 (B), (C) and (D), it also can be found that , (i) the peaks positions of Ni 2p for all the CSNS samples shift to lower banding energy tendency compared with that in pure Ni<sub>3</sub>S<sub>2</sub> (Fig. S3B), (ii) while the Cd 3d peaks in CSNS samples shift to higher values than that of pure CdS (Fig. S3C), and (iii) the S 2p energy peaks of CSNS samples locate between at that of pure CdS and pure Ni<sub>3</sub>S<sub>2</sub> (Fig. S3D). These banding energy shifts of CSNS samples indicate that some Ni atoms

insert into the CdS crystal cell. This results further confirm the intimate coupling between CdS and Ni<sub>3</sub>S<sub>2</sub> for the CSNS samples.

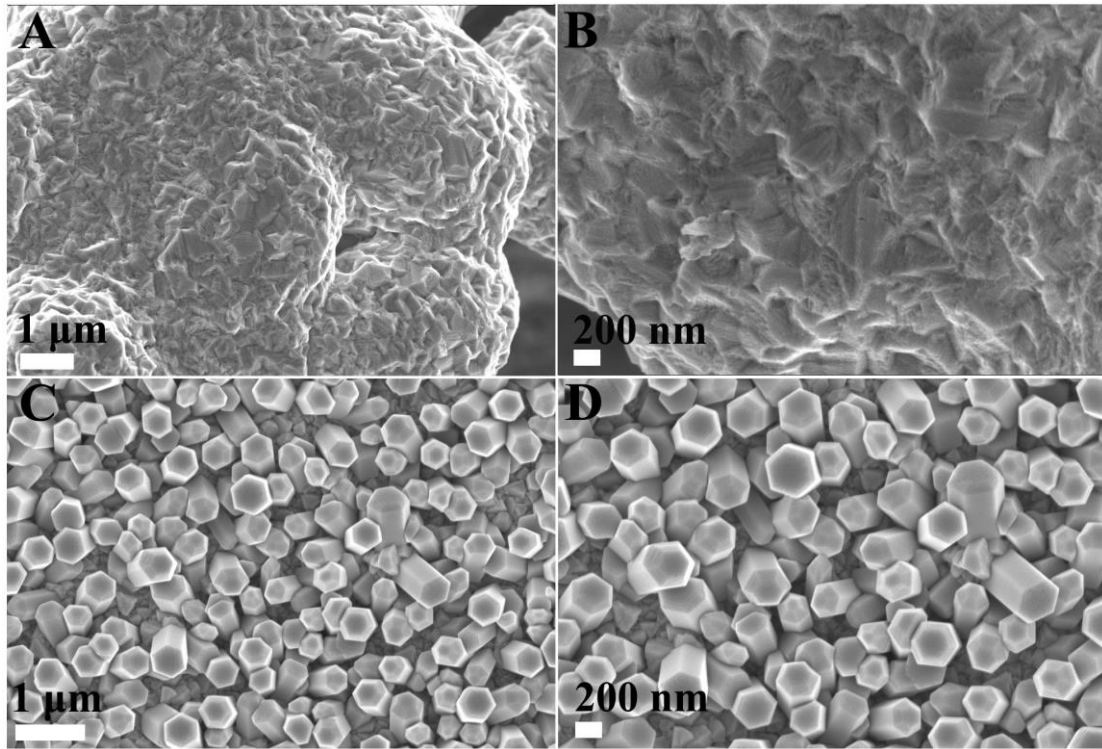

Fig. S4. SEM images of pure  $\text{Ni}_3\text{S}_2$  (A and B) and CdS nanorod arrays (C and D).

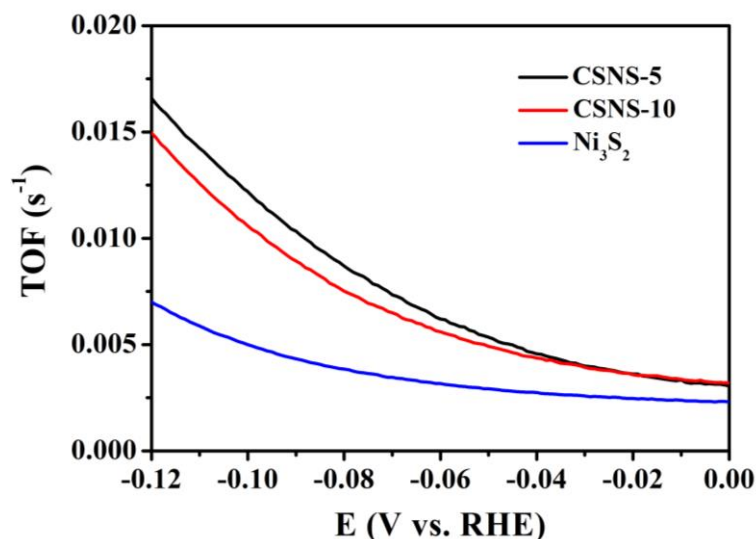

Fig. S5. TOFs of CSNS-5, CSNS-10 and pure Ni<sub>3</sub>S<sub>2</sub> samples calculated at various potentials for HER electrocatalysis.

#### The calculation of turnover frequencies (TOFs) in Fig. S5

According to previous report,<sup>1</sup> the TOFs of the CSNS-5, CSNS-10 and pure Ni<sub>3</sub>S<sub>2</sub> were derived from the following equation (S1):

$$\text{TOF}(S^{-1}) = [i \times \frac{1H_2}{2e^-} \times 1 \frac{e^-}{q_e}] / N_{active} \quad (S1)$$

Where, the current (*i*) was experimentally determined from the electrochemical measurement, and *q<sub>e</sub>* is the electron charge of  $1.602 \times 10^{-19}$  C, *N<sub>active</sub>* is the number of active surface atoms. In this work, the *N<sub>active</sub>* was determined using the ECSA (Fig. S9 and Table. S1), as described in the following equation (S2)

$$N_{active} = ECSA(cm^2) \times N_{aso}(atoms/cm^2) \quad (S2)$$

the *N<sub>aso</sub>* refer to the surface occupancy of catalytic active substances on the electrode surface, which was calculated by previous reported method using the average atoms in the molar volume to a surface.<sup>2</sup> This approach provide a crude upper bound for the TOF values. As following the molar volume (*V<sub>m</sub>*) of Ni<sub>3</sub>S<sub>2</sub> is calculated to be:

$$V_m = \frac{F_w}{\rho} = \frac{240.4 \text{ (g/mol)}}{5.89 \text{ (g/cm}^3\text{)}} = 40.783 \text{ (cm}^3\text{/mol)}$$

therefore, the  $N_{\text{aso}}$  is:

$$N_{\text{aso}} = \left[ \frac{1}{V_m} \times \frac{5 \times 6.02 \times 10^{23} \text{ (atoms)}}{1 \text{ (mol)}} \right]^{\frac{2}{3}} = 1.57 \times 10^{15} \text{ (atoms/cm}^2\text{)}$$

Finally,  $N_{\text{active}}$  were calculated by integrating  $N_{\text{aso}}$  into the equation (2), and then

the TOFs can be obtained from equation (1).



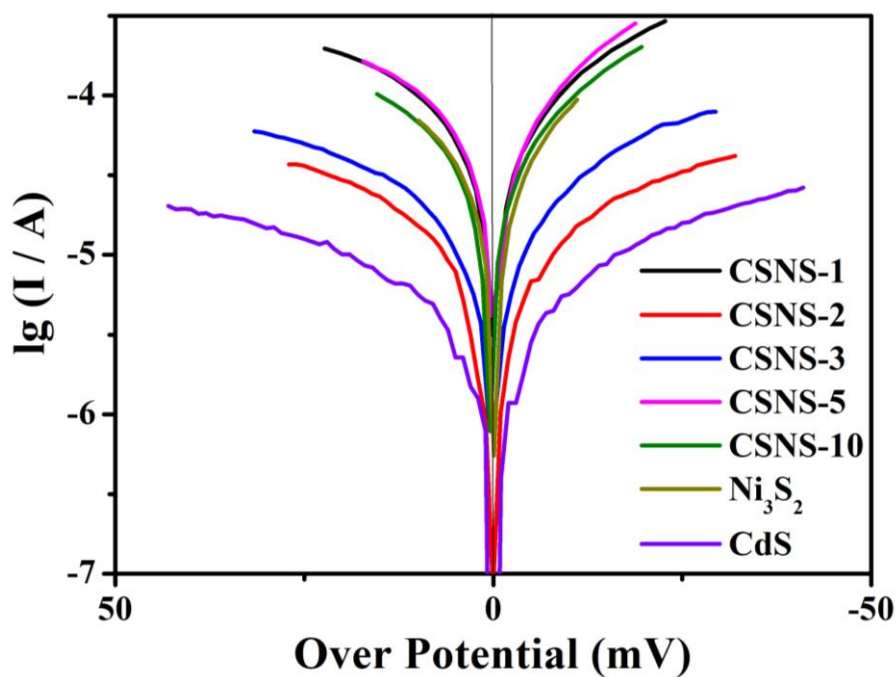

Fig. S6 Tafel plot of all the synthesized samples.

In Fig. S6, the Tafel plot of all the synthesized samples were measured by using electrochemical test, then according to the simplified Butler-Volmer equation (S3)

$$j_k = j_0 \left( e^{\frac{\alpha F}{RT} \eta} - e^{-\frac{(1-\alpha)F}{RT} \eta} \right) \quad (\text{S3})$$

where F, R, and T have their usual significance,  $j_k$  and  $j_0$  stand for kinetic and exchange current density, respectively, the exchange current density ( $j_0$ ) for all the synthesized samples were obtain as shown Table S1,<sup>3</sup>

Table S1. Calculated exchange current density for all the synthesized samples.

| Samples       | CSNS-1 | CSNS-2 | CSNS-3 | CSNS-5 | CSNS-10 | Ni <sub>3</sub> S <sub>2</sub> | CdS    |
|---------------|--------|--------|--------|--------|---------|--------------------------------|--------|
| Log ( $j_0$ ) | -4.184 | -4.996 | -4.819 | -4.298 | -4.478  | -4.554                         | -5.242 |
| $j_0$ (mA)    | 0.065  | 0.010  | 0.015  | 0.050  | 0.033   | 0.028                          | 0.006  |

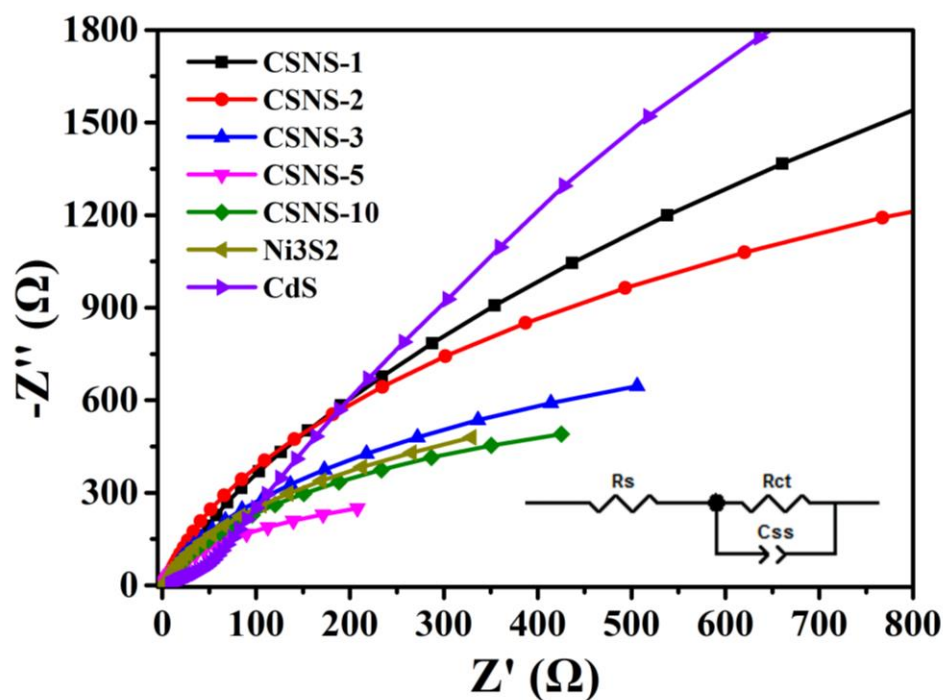

Fig. S7. Nyquist plots of all the CSNS-x samples, pure CdS and Ni<sub>3</sub>S<sub>2</sub>.

As can be seen in the EIS plot, the equivalent circuit (inset in Fig. S7) is composed of three electrochemical parameters,  $R_s$ ,  $R_{ct}$  and CPE, which represent the electrolyte resistance, charge-transfer resistance and a constant phase element, respectively. Obviously, it is found that the  $R_{ct}$  values are gradually decreased from CSNS-1 to CSNS-5, this result indicates that the increased Ni<sub>3</sub>S<sub>2</sub> amounts enhance the electronic conductivity of the synthesized electrodes. While, the CSNS-10 electrodes exhibit a similar  $R_{ct}$  value as that of pure Ni<sub>3</sub>S<sub>2</sub> electrodes, which are a little higher than that of CSNS-5. This phenomenon may be caused by the diffusion effect of electrolyte solution on the electrode surface as the ECSA value of CSNS-5 is higher than that of these two samples.

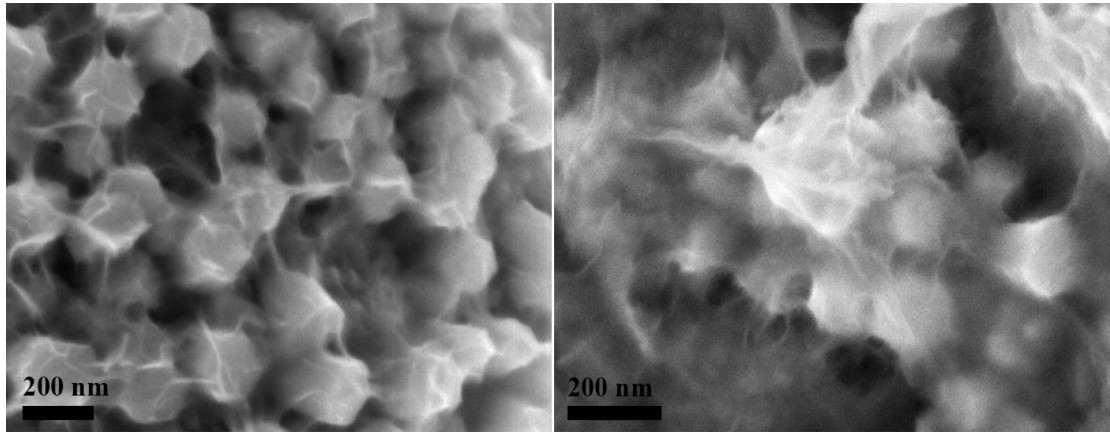

Fig. S8. High magnification SEM images of CSNS-10 core@shell nanorods arrays.

The Fig. S8 reveals the high magnification SEM images of CSNS-10 with a thick  $\text{Ni}_3\text{S}_2$  nanosheets layers. It can be seen from Fig. S5 A that the  $\text{Ni}_3\text{S}_2$  nanosheets on different nanorods have combined with each other into a whole layer covering on the surface of CdS nanorods. And in this sample, we have also found that some  $\text{Ni}_3\text{S}_2$  nanosheets have fully covered the spaces between the nanorods with a relative flat surface. This result would largely reduce the catalytic active sites due to the decreased exposing surface of  $\text{Ni}_3\text{S}_2$  nanosheets.

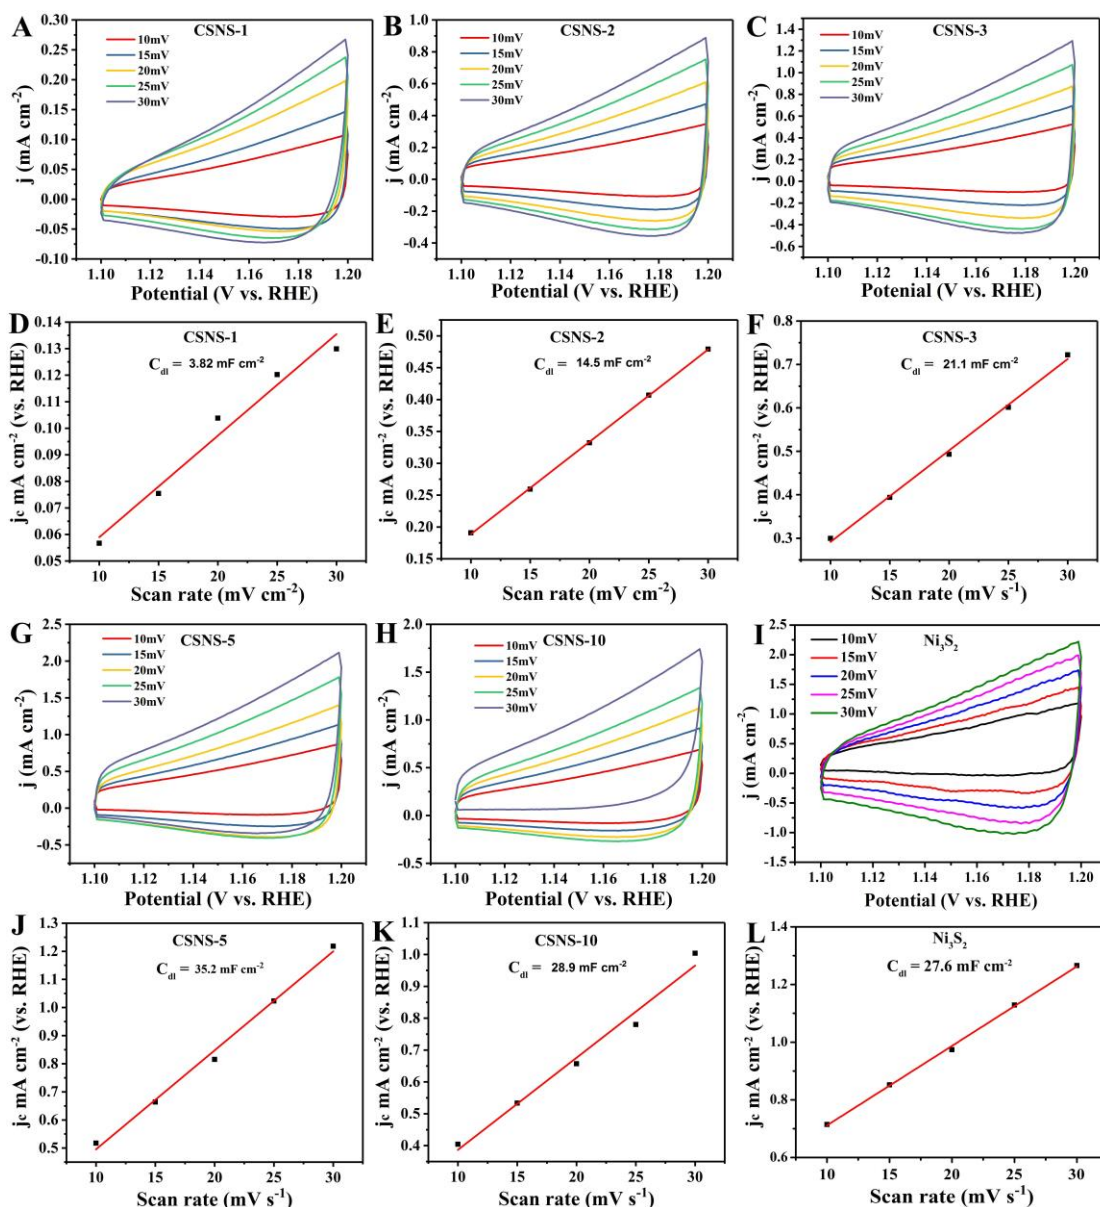

Fig. S9. (A-E) CV curves of CSNS-x samples under various scan rates from 10 to 30  $\text{mV s}^{-1}$  in the non-Faradaic potential range (1.1 ~ 1.2 eV vs Ag/AgCl); (F-J) the corresponding  $C_{dl}$  plot of CSNS-x samples derived from current densities at 1.15 V vs RHE (in A-E) against the scan rates, and (A, E) for CSNS 1 nm; (B, G) for CSNS-2; (C, H) for CSNS-3; (D, I) for CSNS-5; (E, J) for CSNS-10, respectively.

According to the Fig. S9, the calculated ECSA values for CSNS-x samples were summarized in the following Table S2.

Table S2. Comparison of ECSA towards the different CSNS-x catalysts

| Sample                         | $C_{dl}$ (mF cm <sup>-2</sup> ) | ECSA (cm <sup>2</sup> ) |
|--------------------------------|---------------------------------|-------------------------|
| CSNS-1                         | 3.82                            | 95.5                    |
| CSNS-2                         | 14.5                            | 362.5                   |
| CSNS-3                         | 21.1                            | 527.5                   |
| CSNS-5                         | 35.2                            | 880                     |
| CSNS-10                        | 28.9                            | 722.5                   |
| Ni <sub>3</sub> S <sub>2</sub> | 27.6                            | 690.0                   |

Table S3

Summary of electrochemical data of Partial Ni based electrocatalysts

| Electronic catalysts                                     | Working solution | OER                          |                                       |                                     | HER                          |                                       |                                     | Reference |
|----------------------------------------------------------|------------------|------------------------------|---------------------------------------|-------------------------------------|------------------------------|---------------------------------------|-------------------------------------|-----------|
|                                                          |                  | On set potential (V vs. RHE) | $\eta$ to 20 mA cm <sup>-2</sup> (mV) | Tafel slope (mV dec <sup>-1</sup> ) | On set potential (V vs. RHE) | $\eta$ to 10 mA cm <sup>-2</sup> (mV) | Tafel slope (mV dec <sup>-1</sup> ) |           |
| CdS@Ni <sub>3</sub> S <sub>2</sub> -5                    | 1.0M KOH         | 1.49                         | 310                                   | 176.8                               | -0.03                        | 142                                   | 138.6                               | This work |
| CuO@Ni-P NA/CF                                           | 1.0M KOH         | ab.<br>1.5                   | --                                    | 124.9                               | ab.<br>-0.03                 | ab.<br>95                             | 72.0                                | 4         |
| Ni-P/CF                                                  |                  | Ab<br>1.6                    | --                                    | --                                  | ab.<br>-0.14                 | ab.<br>200                            | --                                  |           |
| Ni <sub>3</sub> Te <sub>2</sub><br>(Electrodeposition)   | 1M KOH           | 1.38                         | Ab<br>200                             | 54.2                                | Ab.<br>-0.2                  | 250                                   | 73.1                                | 5         |
| Ni <sub>3</sub> Te <sub>2</sub><br>(Hydrothermal)        |                  | 1.38                         | Ab<br>220                             | 61.5                                | Ab.<br>-0.1                  | 250                                   | 126.2                               |           |
| Ni <sub>3</sub> S <sub>2</sub> /NF                       | 1M KOH           | Ab.<br>1.33                  | ab.<br>270                            | --                                  | Ab.<br>-0.14                 | Ab.<br>290                            | --                                  | 6         |
|                                                          | PBS(pH=7)        | --                           | --                                    | --                                  | Ab.<br>-0.05                 | Ab.<br>150                            | --                                  |           |
| Fe-Ni(OH) <sub>2</sub> /NF                               | 1M KOH           | Ab.<br>1.48                  | Ab.<br>280                            | 51.5                                | --                           | --                                    | --                                  | 7         |
| Zn-Ni <sub>3</sub> S <sub>2</sub> /NF                    | 1M KOH           | Ab.<br>1.51                  | --                                    | 87                                  | --                           | --                                    | --                                  | 8         |
| MoO <sub>3</sub> /Ni <sub>3</sub> S <sub>2</sub> /NF     | 1M KOH           | --                           | --                                    | --                                  | Ab.<br>-0.1                  | Ab.<br>180                            | --                                  | 9         |
| CdS-MoO <sub>3</sub> /Ni <sub>3</sub> S <sub>2</sub> /NF |                  | --                           | --                                    | --                                  | Ab.<br>-0.03                 | Ab.<br>90                             | --                                  |           |
| Ni <sub>3</sub> S <sub>2</sub> /PNF                      | 1M KOH           | Ab.<br>1.47                  | Ab.<br>290                            | 238                                 | Ab.<br>-0.1                  | Ab.<br>220                            | 118                                 | 10        |
| 1mM CdS/Ni <sub>3</sub> S <sub>2</sub> /PNF              |                  | Ab.<br>1.5                   | Ab.<br>350                            | 192                                 | Ab.<br>-0.1                  | Ab.<br>180                            | 110                                 |           |
| 3mM CdS/Ni <sub>3</sub> S <sub>2</sub> /PNF              |                  | --                           | --                                    | --                                  | Ab.<br>-0.1                  | Ab.<br>220                            | 187                                 |           |
| 5mM CdS/Ni <sub>3</sub> S <sub>2</sub> /PNF              |                  | --                           | --                                    | --                                  | Ab.<br>-0.1                  | Ab.<br>220                            | 167                                 |           |
| Ni <sub>2</sub> P nanowires                              | 1M KOH           | Ab.<br>1.51                  | Ab.<br>340                            | 47                                  | --                           | --                                    | --                                  | 11        |
| Ni <sub>2</sub> P nanoparticles                          |                  | Ab.<br>1.47                  | Ab.<br>300                            | 59                                  | --                           | --                                    | --                                  |           |
| Ni(OH) <sub>2</sub>                                      |                  | Ab.<br>1.51                  | Ab.<br>340                            | 59                                  | --                           | --                                    | --                                  |           |
| Ni <sub>3</sub> Se@Au(No dissolution)                    |                  | 1.43                         | Ab.<br>330                            | 87.1                                | -0.19                        | Ab.<br>380                            | 188.1                               | 12        |

|                                                                       |                                     |             |            |       |              |            |       |    |
|-----------------------------------------------------------------------|-------------------------------------|-------------|------------|-------|--------------|------------|-------|----|
| Ni <sub>3</sub> Se@Au(15s dissolution)                                | 1M NaOH                             | 1.40        | Ab.<br>270 | 54.6  | -0.16        | Ab.<br>320 | 234.4 |    |
| Ni <sub>3</sub> Se@Au(30s dissolution)                                |                                     | 1.39        | Ab.<br>260 | 48.9  | -0.16        | Ab.<br>310 | 230.4 |    |
| Ni <sub>2</sub> P-NRs/Ni                                              | 0.5M H <sub>2</sub> SO <sub>4</sub> | --          | --         | --    | Ab.<br>-0.1  | Ab.<br>180 | 106.1 | 13 |
| Ni(OH) <sub>2</sub> @NF                                               | 1M KOH                              | --          | --         | --    | Ab.<br>-0.05 | Ab.<br>180 | 107.4 | 14 |
| Ni <sub>3</sub> S <sub>2</sub> @NF                                    |                                     | --          | --         | --    | Ab.<br>-1.2  | Ab.<br>220 | 50.2  |    |
| MS-Ni <sub>3</sub> Se <sub>2</sub> /Ni                                | 1M KOH                              | Ab.<br>1.60 | --         | --    | Ab.<br>-0.24 | Ab.<br>250 | 118   | 15 |
| NF-Ni <sub>3</sub> Se <sub>2</sub> /Ni                                |                                     | Ab.<br>1.50 | --         | --    | Ab.<br>-0.16 | Ab.<br>210 | 79    |    |
| NiS-Ni(OH) <sub>2</sub> /aMoS <sub>2</sub> <sup>2+</sup> <sub>x</sub> | 1M KOH                              | Ab.<br>1.55 | 460        | 97    | Ab.<br>-0.12 | Ab.<br>170 | 81    | 16 |
| NiCo <sub>2</sub> S <sub>4</sub> /NF                                  | 1M KOH                              | Ab.<br>1.50 | --         | 53.3  | Ab.<br>-0.09 | Ab.<br>220 | 97.1  | 17 |
| Ni <sub>3</sub> S <sub>2</sub> /NF                                    |                                     | Ab.<br>1.55 | Ab.<br>350 | 103.3 | Ab.<br>-0.17 | Ab.<br>300 | 116.3 |    |
| NiCo <sub>2</sub> O <sub>4</sub> /NF                                  |                                     | Ab.<br>1.55 | Ab.<br>330 | 97.7  | Ab.<br>-0.15 | Ab.<br>320 | 107.5 |    |
| Mn-Ni <sub>2</sub> P/NF                                               | 1M KOH                              | --          | --         | --    | Ab.<br>-0.13 | 103        | 135   | 18 |
| Ni <sub>2</sub> P/NF                                                  |                                     | --          | --         | --    | Ab.<br>-0.2  | 82         | 138   |    |
| NiS/NF                                                                | 1M KOH                              | Ab.<br>1.52 | --         | 89    | Ab.<br>-0.1  | Ab.<br>180 | 83    | 19 |

Ab. : the estimated data from the corresponding references

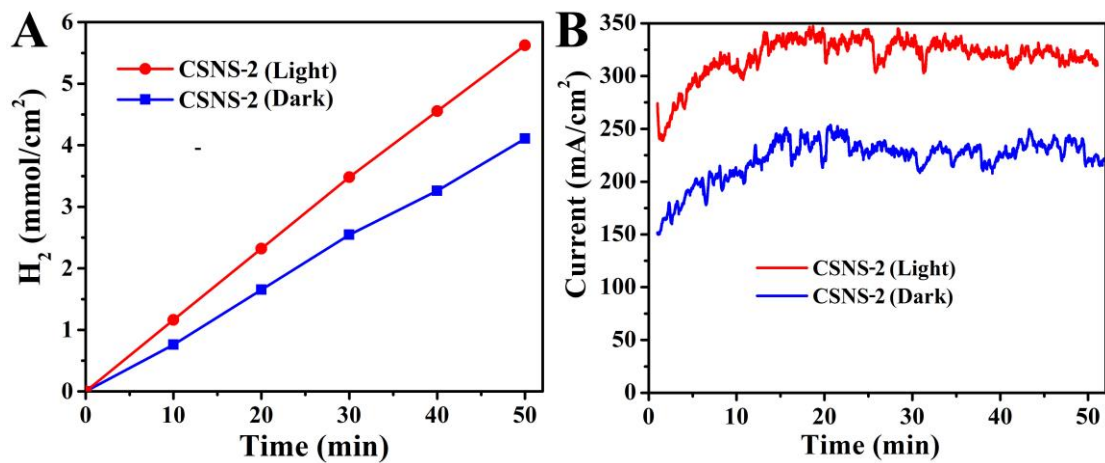

Fig. S10. (A) EC (blue line) and PEC (red line) H<sub>2</sub> evolution properties of CSNS-2 sample under 0.2 V external bias (vs Ag/AgCl) in the Na<sub>2</sub>S and Na<sub>2</sub>SO<sub>3</sub> mixed solution, and (B) the recorded electrical (blue line) and photo-electrical (red line) current intensity during the EC and PEC H<sub>2</sub> evolution process.



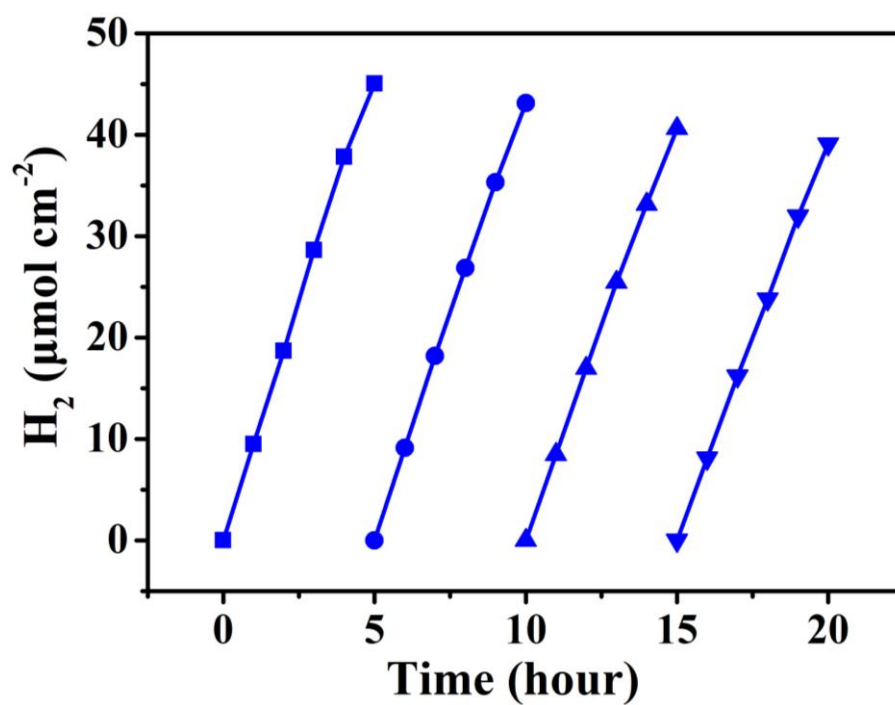

Fig. S11. Time course of photocatalytic H<sub>2</sub>-production over CSNS-5 sample, every five hours the reaction system was bubbled with N<sub>2</sub> for 30 min to remove the H<sub>2</sub> inside in the reactor.

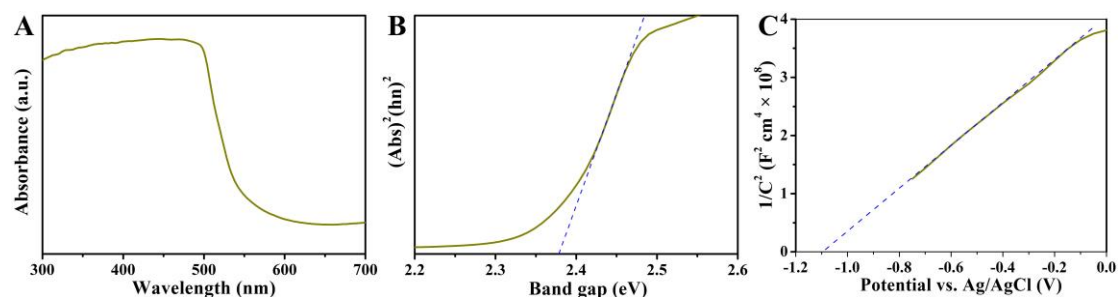

Fig. S12. The UV-visible diffuse reflection spectra (A), the translated Tauc plots and the Mott-Schottky (MS) plots of pure CdS nanorod arrays.

The band gap structure of pure CdS nanorod arrays was measurements by the UV-visible diffuse reflection spectra, the translated Tauc plots and the Mott-Schottky plots as shown in Fig. S12. According to the UV-visible diffuse reflection spectra (A), the band gap of CdS nanorod arrays were determined to be 2.38 eV (B), and the Mott-Schottky (MS) plots reflected that the  $E_{fb}$  of CdS is about -1.10 eV. Therefore, the CB and VB position of CdS was estimated to be at -1.30 and 1.08 eV (vs Ag/AgCl), respectively.

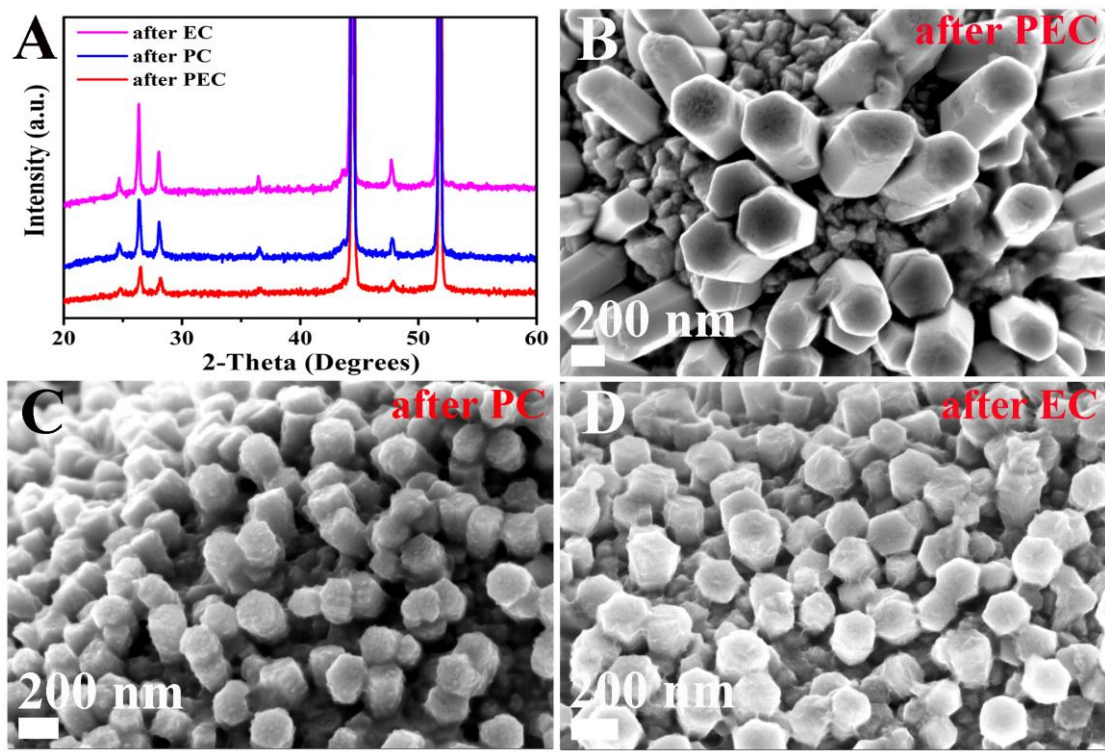

Fig. S13. The XRD patterns (A) and corresponding SEM images of CSNS-2 (B), CSNS-3 (C) and CSNS-5 (D) after the long time PEC, PC and EC process.

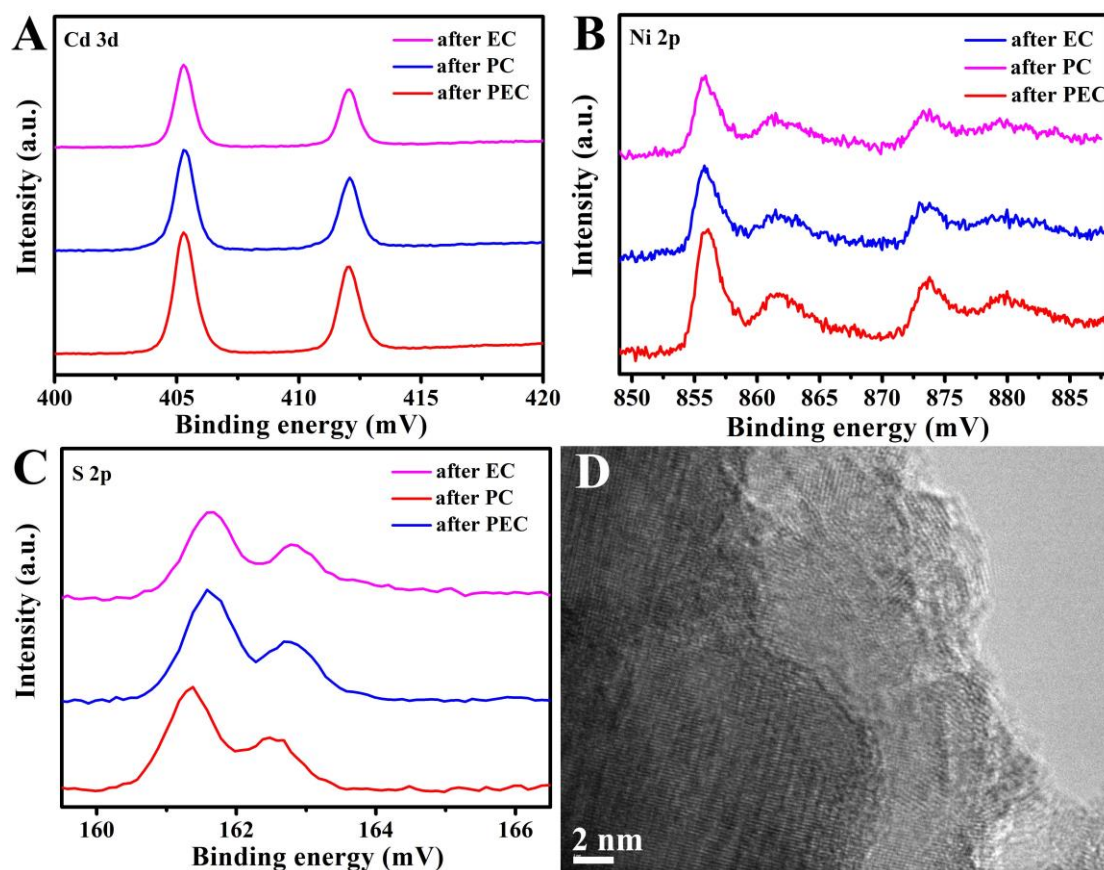

Fig. S14. XPS spectra of Cd 3d (A), Ni 2p (B) and S 2p (C) for CSNS-2, CSNS-3 and CSNS-5 after the long time PEC, PC and EC process.. The results indicate that the surface structure remained unchanged after corresponding catalysis process.

## References

1. B. Seo, D. S. Baek, Y. J. Sa and S. H. Joo, *CrystEngComm*, 2016, **18**, 6083-6089.
2. E. J. Popczun, J. R. McKone, C. G. Read, A. J. Biech, A. M. Wiltrout, N. S. Lewis and R. E. Schaak, *J. Am. Chem. Soc.*, 2013, **135**, 9267-9270.
3. A. Oh, Y. J. Sa, H. Hwang, H. Baik, J. Kim, B. Kim, S. H. Joo and K. Lee, *Nanoscale*, 2016, **8**, 16379-16386.
4. B. Chang, S. Hao, Z. Ye and Y. Yang, *Chem. Commun*, 2018, **54**, 2393-2396.
5. U. De Silva, J. Masud, N. Zhang, Y. Hong, W. P. R. Liyanage, M. Asle Zaem and M. Nath, *J. Mater. Chem. A*, **2018**, *6*, 7608-7622.
6. L. L. Feng, G. Yu, Y. Wu, G. D. Li, H. Li, Y. Sun, T. Asefa, W. Chen and X. Zou, *J. Am. Chem. Soc.*, **2015**, *137*, 14023-6.

7. J. Liu, Y. Zheng, Z. Wang, Z. Lu, A. Vasileff and S. Z. Qiao, *Chem. Commun.*, **2018**, *54*, 463-466.
8. Q. Liu, L. Xie, Z. Liu, G. Du, A. M. Asiri and X. Sun, *Chem. Commun.*, **2017**, *53*, 12446-12449.
9. W. Lu, Y. Song, M. Dou, J. Ji and F. Wang, *Chem. Commun.*, **2018**, *54*, 646-649.
10. S. Qu, J. Huang, J. Yu, G. Chen, W. Hu, M. Yin, R. Zhang, S. Chu and C. Li, *ACS Appl. Mater. Interfaces*, **2017**, *9*, 29660-29668.
11. L. A. Stern, L. G. Feng, F. Song and X. L. Hu, *Energy Environ. Sci.*, **2015**, *8*, 2347-2351.
12. A. T. Swesi, J. Masud and M. Nath, *J. Mater. Res.*, **2016**, *31*, 2888-2896.
13. X. Wang, Y. V. Kolen'ko and L. Liu, *Chem. Commun.*, **2015**, *51*, 6738-41.
14. M. Wu, S. Wang and J. Wang, *Electrochim. Acta*, **2017**, *258*, 669-676.
15. R. Xu, R. Wu, Y. Shi, J. Zhang and B. Zhang, *Nano Energy*, **2016**, *24*, 103-110.
16. T. Yoon and K. S. Kim, *Adv. Funct. Mater.*, **2016**, *26*, 7386-7393.
17. J. Yu, C. X. Lv, L. Zhao, L. X. Zhang, Z. H. Wang and Q. Y. Liu, *Adv. Mater. Interfaces*, **2018**, *5*, 1701396.
18. Y. Zhang, Y. Liu, M. Ma, X. Ren, Z. Liu, G. Du, A. M. Asiri and X. Sun, *Chem. Commun.*, **2017**, *53*, 11048-11051.
19. W. Zhu, X. Yue, W. Zhang, S. Yu, Y. Zhang, J. Wang and J. Wang, *Chem. Commun.*, **2016**, *52*, 1486-9.
